# Supplementary material for: Andrographolide impedes cancer stemness and enhances radio-sensitivity in oral carcinomas via miR-218 activation
Source: PubMed Central journal article supplement (PMC5354823; doi:10.18632/oncotarget.13755), 2016-12-01
Supplement: oncotarget-08-4196-s001.pdf [file oncotarget-08-4196-s001.pdf]

# Andrographolide impedes cancer stemness and enhances radio-sensitivity in oral carcinomas via miR-218 activation

## Supplementary Materials

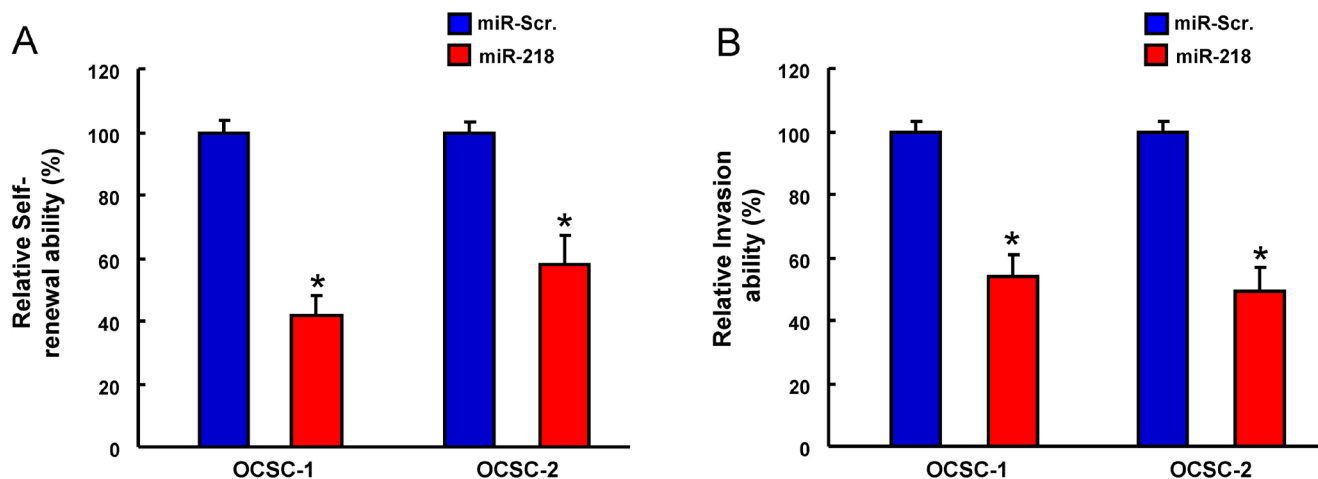

Supplementary Figure S1: miR-218 suppresses self-renewal and invasion abilities pLV-miR-218- and pLV-miR-Scr.-transfected OCSC cells were analyzed for secondary spheres-forming (A) and invasion (B) abilities. \* $p < 0.05$  vs. Control.
